# Supplementary figures and images for: A Modified Tridecapeptide Probe for Imaging Cell Junction
Source: MDPI journal article supplement (doi:10.3390/molecules29051003), 2024-02-25

Mass spectral analysis details of fluorescein labelled tridecapeptide.

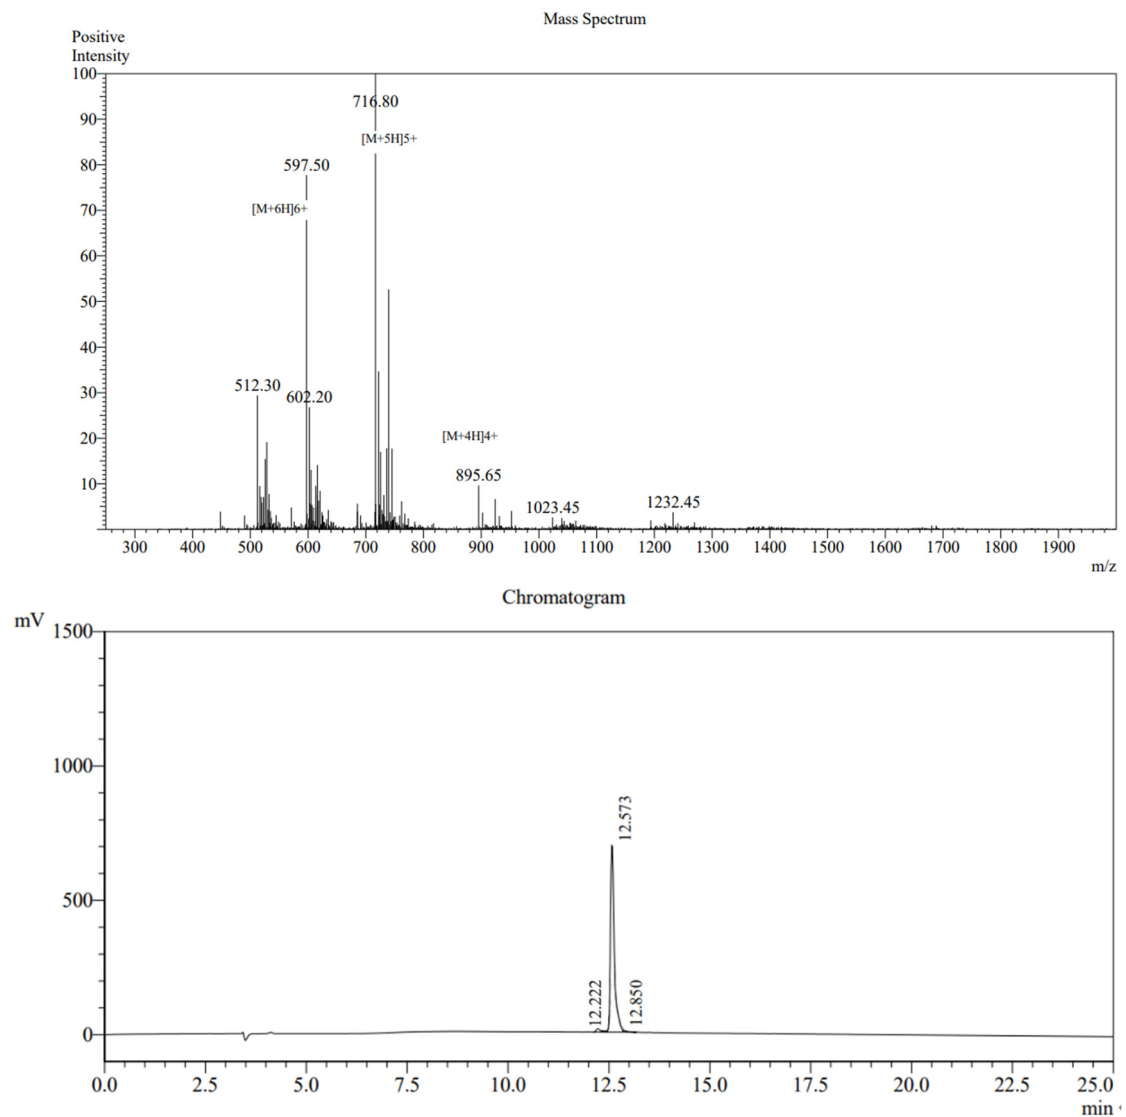

Supplement: s1 [file s1]
